# Supplementary material
Source: Springer Nature journal article supplement (https://www.springermedizin.de/resource/supplementary/12887_2011_548_MOESM11_ESM.pdf/9475412)

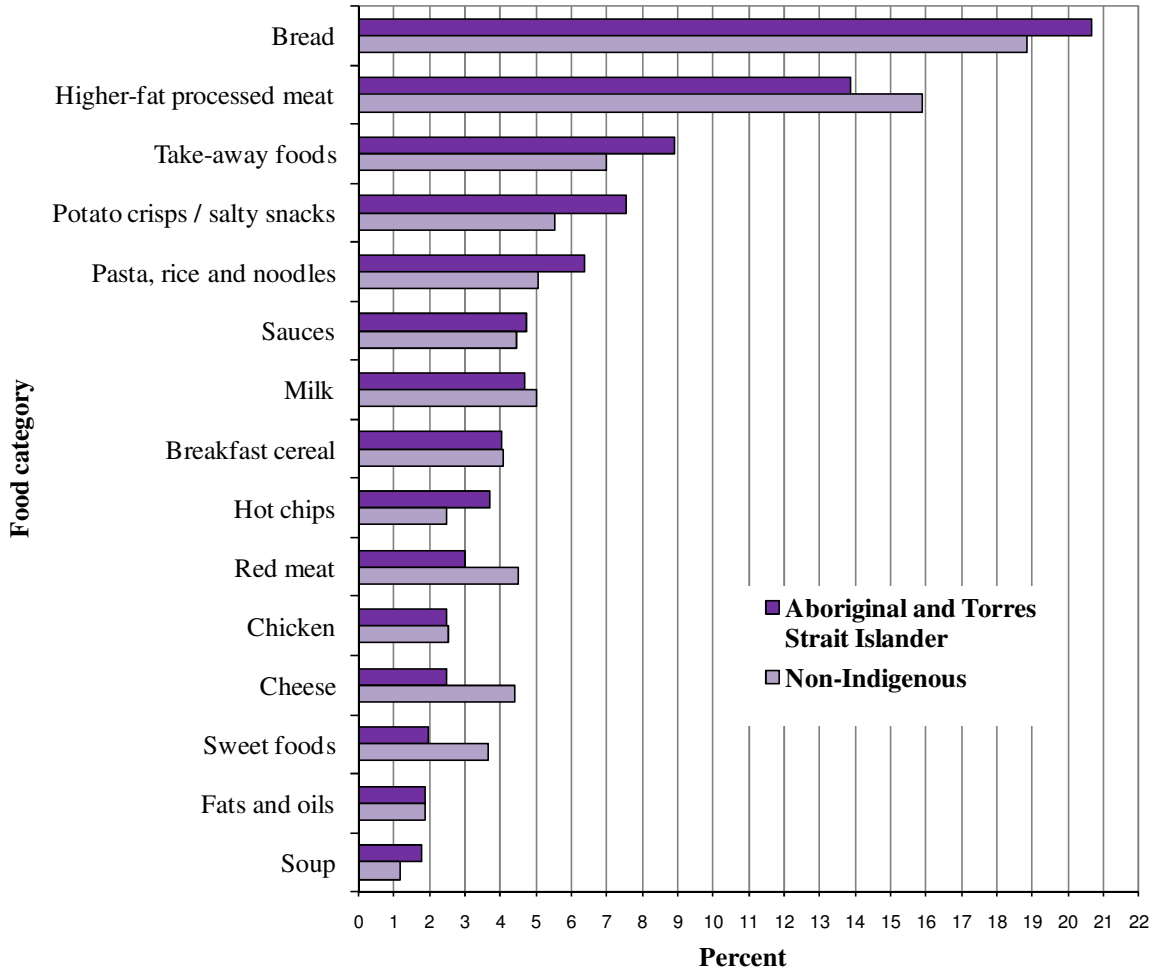

Supplement: MOESM11 [file 9475412]
